# Supplementary material for: Abstinent Heroin Addicts Tend to Take Risks: ERP and Source Localization
Source: PubMed Central journal article supplement (PMC5723666; doi:10.3389/fnins.2017.00681), 2017-12-06
Supplement: DataSheet1.pdf [file DataSheet1.pdf]

*Supplementary Material*

**Abstinent heroin addicts tend to take risks: ERP and source localization**

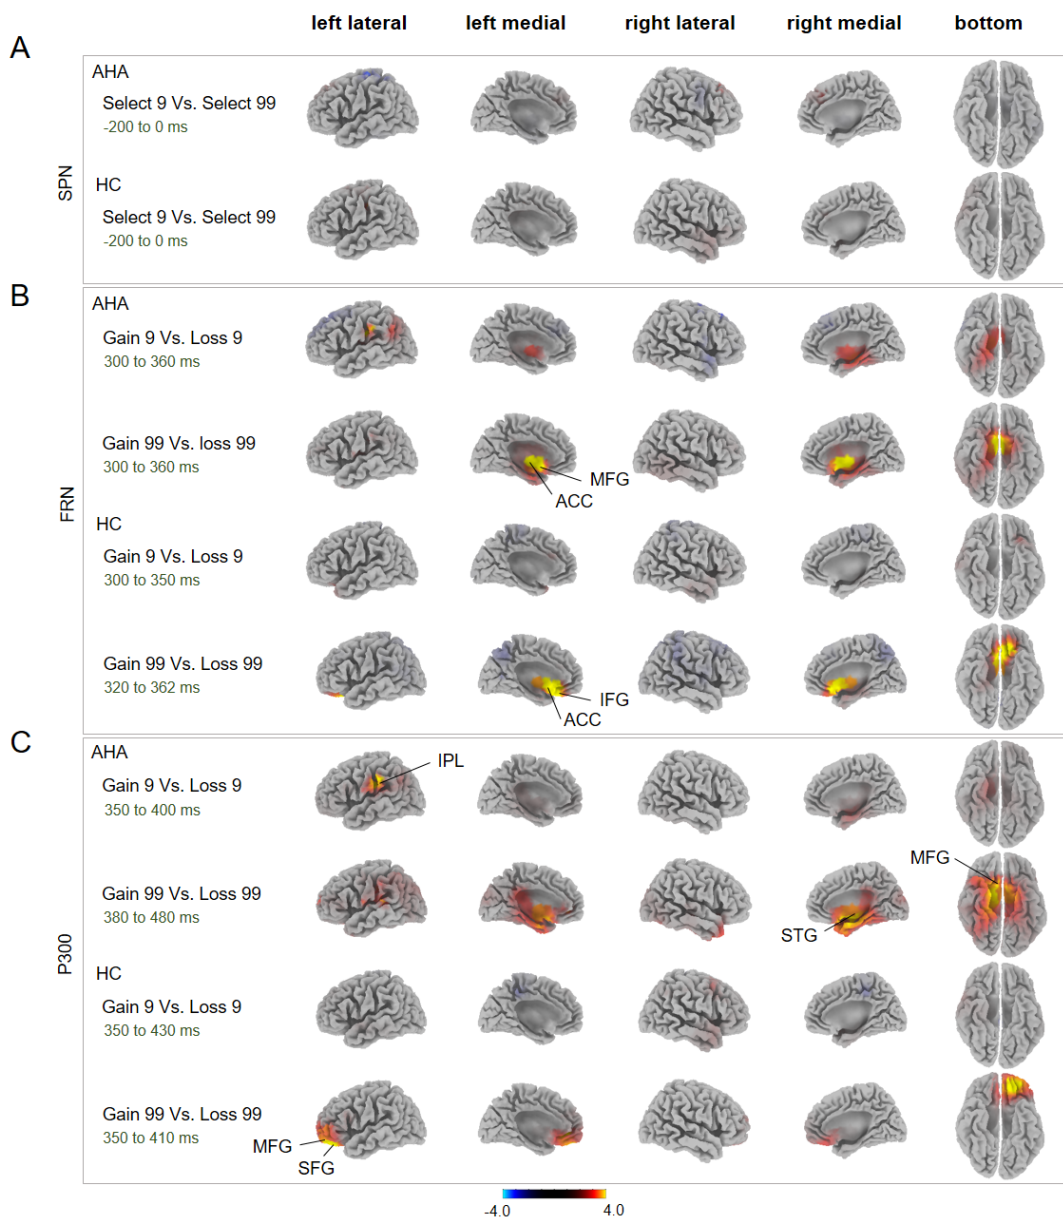

**Figure S1 –Within-group comparisons for SPN, FRN and P300 sources.** The t-score maps for within-subjects comparison are shown in low- (select 9) and high-risk (select 99) options for the SPN (up panel, A), FRN (middle panel, B), and P300 (bottom panel, C) of feedback outcomes,

respectively. The brain regions labeled with yellow/red indicate increased activity of the former compared with the latter (e.g. gain vs. loss). Significant brain regions ( $p < 0.05$ , FWE corrected) are indicated on the map. The peak MNI coordinates for the contrast per condition in each group are described in **Supplementary Table S1**. **Abbreviations:** ACC, anterior cingulate cortex; IPL, inferior parietal lobule; IFG, inferior frontal gyrus; MFG, middle frontal gyrus; SFG, superior frontal gyrus; STG, superior temporal gyrus.

**Supplementary Table S1 - Within-subjects comparisons for various ERP sources.**

| ERPs       | Time (ms) | Condition              | Coordinate region | Peak MNI Coordinate |     |     | P-value  |          |
|------------|-----------|------------------------|-------------------|---------------------|-----|-----|----------|----------|
| <b>AHA</b> |           |                        |                   |                     |     |     |          |          |
| SPN        | -100 - 0  | Select 9 Vs. Select 99 |                   |                     |     |     | 0.1502   |          |
| FRN        | 290 - 350 | Gain 9 Vs. Gain 99     | Postcentral gyrus | -50                 | -25 | 30  | 0.3944   |          |
|            |           | Loss 9 Vs. Loss 99     |                   |                     |     |     |          |          |
|            |           | Gain 9 Vs. Loss 9      | Postcentral gyrus | -50                 | -25 | 30  |          | 0.0364*  |
|            |           | Gain 99 Vs. Loss 99    | ACC               | 5                   | 5   | -5  |          | 0.0008** |
|            |           |                        | MFG               | 15                  | 10  | -20 |          |          |
|            |           |                        | Hippocampus       | 15                  | -5  | -15 |          |          |
| P300       | 360-420   | Gain 9 Vs. Gain 99     | IPL               | -60                 | -25 | 35  | 0.0152*  |          |
|            |           |                        | Postcentral gyrus | -55                 | -25 | 30  |          |          |
|            |           | Loss 9 Vs. Loss 99     |                   |                     |     |     | 0.2142   |          |
|            |           | Gain 9 Vs. Loss 9      | IPL               | -55                 | -25 | 30  | 0.0146*  |          |
|            |           |                        | Postcentral gyrus | -60                 | -25 | 35  |          |          |
|            |           | Gain 99 Vs. Loss 99    | MFG               | -15                 | 45  | 5   | 0.0046** |          |
|            |           |                        | STG               | -50                 | -30 | 15  |          |          |
| <b>HC</b>  |           |                        |                   |                     |     |     |          |          |
| SPN        | -100 - 0  | Select 9 Vs. Select 99 |                   |                     |     |     | 0.1832   |          |
| FRN        | 290 - 350 | Gain 9 Vs. Gain 99     | MFG               | 15                  | -15 | 60  | 0.0358*  |          |
|            |           |                        | SFG               | 20                  | -15 | 70  |          |          |
|            |           | Loss 9 Vs. Loss 99     |                   |                     |     |     | 0.2392   |          |
|            |           | Gain 9 Vs. Loss 9      |                   |                     |     |     | 0.7994   |          |
|            |           | Gain 99 Vs. Loss 99    | IFG               | -20                 | 30  | -5  | 0.0036** |          |
|            |           |                        | ACC               | -5                  | 20  | -5  |          |          |
| P300       | 360-420   | Gain 9 Vs. Gain 99     | MFG               | 10                  | -15 | 60  | 0.0284*  |          |
|            |           | Loss 9 Vs. Loss 99     |                   |                     |     |     | 0.4406   |          |
|            |           | Gain 9 Vs. Loss 9      |                   |                     |     |     | 0.5440   |          |
|            |           | Gain 99 Vs. Loss 99    | SFG               | -15                 | 50  | -20 | 0.0090** |          |
|            |           |                        | MFG               | -15                 | 45  | -20 |          |          |
|            |           |                        | Orbital gyrus     | -10                 | 50  | -25 |          |          |

Peak MNI coordinates for **between-subjects comparison between AHAs and HCs**. Clusters surviving FWE-corrected threshold  $p < 0.05$ .

**Abbreviations:** ACC, anterior cingulate cortex; IPL, inferior parietal lobule; IFG, inferior frontal gyrus; MFG, middle frontal gyrus; SFG, superior frontal gyrus; STG, superior temporal gyrus.
